# Supplementary material for: Design and preparation of novel antioxidant and antibacterial films containing procyanidins and phycocyanin for food packaging
Source: Royal Society of Chemistry journal article supplement (doi:10.1039/d3ra08653d), 2024-01-01
Supplement: d3ra08653d1.pdf [file d3ra08653d1.pdf]

**Design and preparation of novel antioxidant and antibacterial films containing  
procyanidins and phycocyanin for food packaging**

Shanshan Tie, Qing Zhang, Yixuan Zhao, Ying Wu, Dasu Liu, Lina Zhao, and  
Shaobin Gu\*

*<sup>a</sup>College of Food and Bioengineering, Henan University of Science and Technology,  
Luoyang 471023, China*

\*Corresponding author: Shaobin Gu

Tel: +86-379-64282342

Fax: +86-379-64282342

E-mail: shaobingu@haust.edu.cn

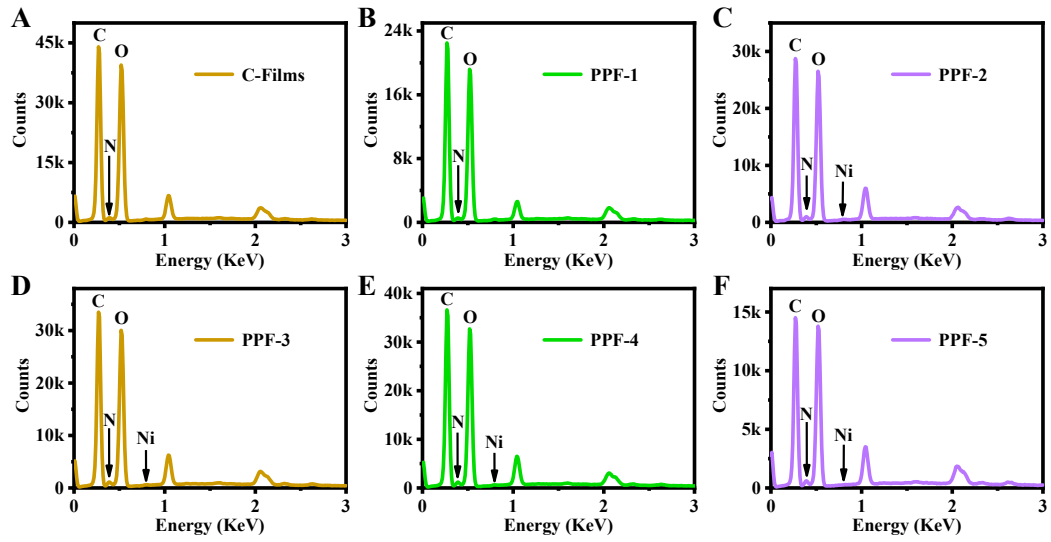

Fig. S1 EDS element analysis of (A) C-Film, (B) PPF-1, (C) PPF-2, (D) PPF-3, (E) PPF-4 and (F) PPF-5.

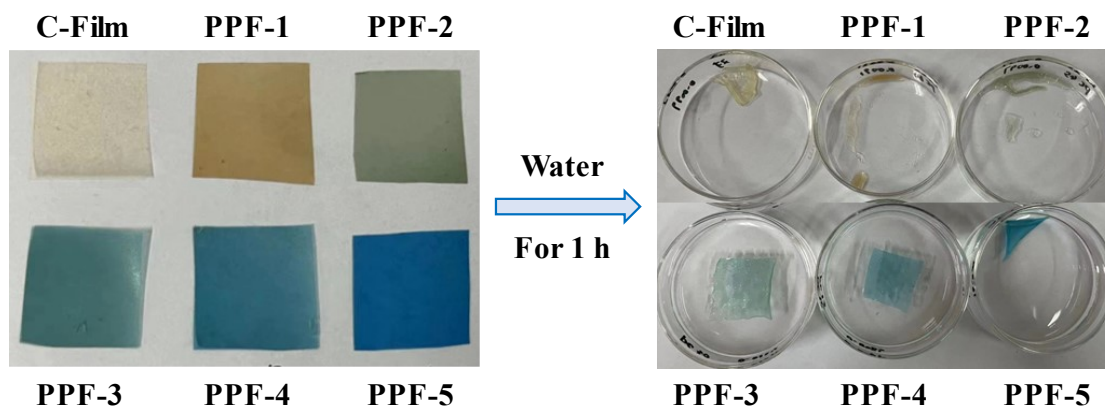

Fig. S2 Changes of the prepared films after immersing in water for 1 h.

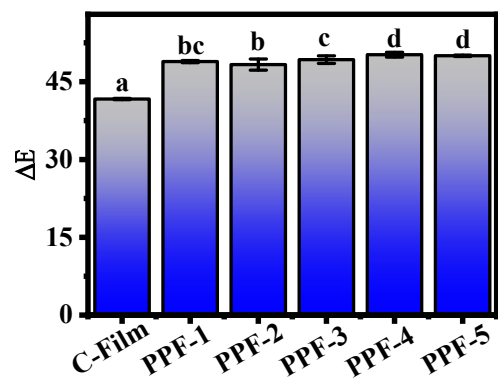

Fig. S3 Color parameters of  $\Delta E$  in C-Film, PPF-1, PPF-2, PPF-3, PPF-4 and PPF-5 films.

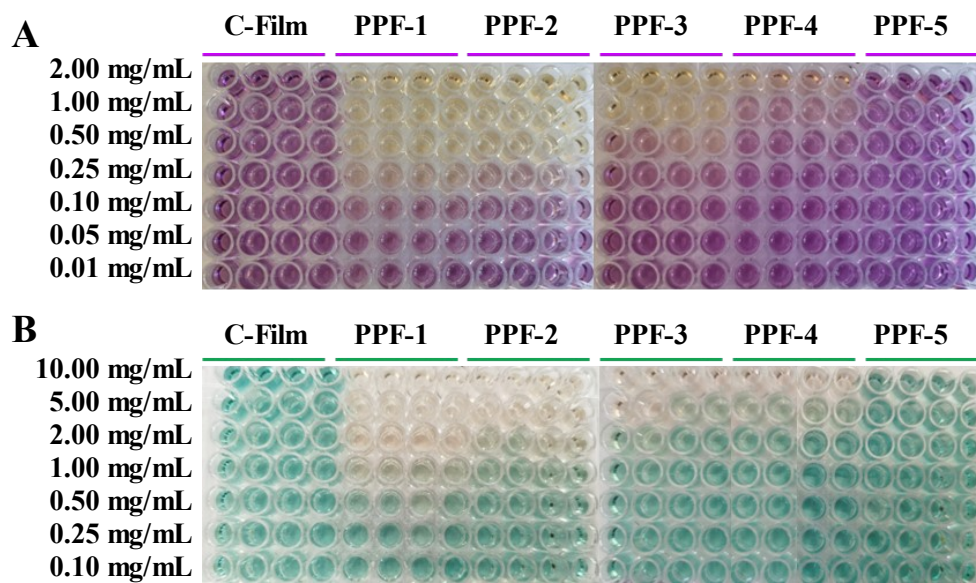

Fig. S4 The optical images of (A) DPPH and (B) ABTS radical scavenging ability of C-Film, PPF-1, PPF-2, PPF-3, PPF-4 and PPF-5.

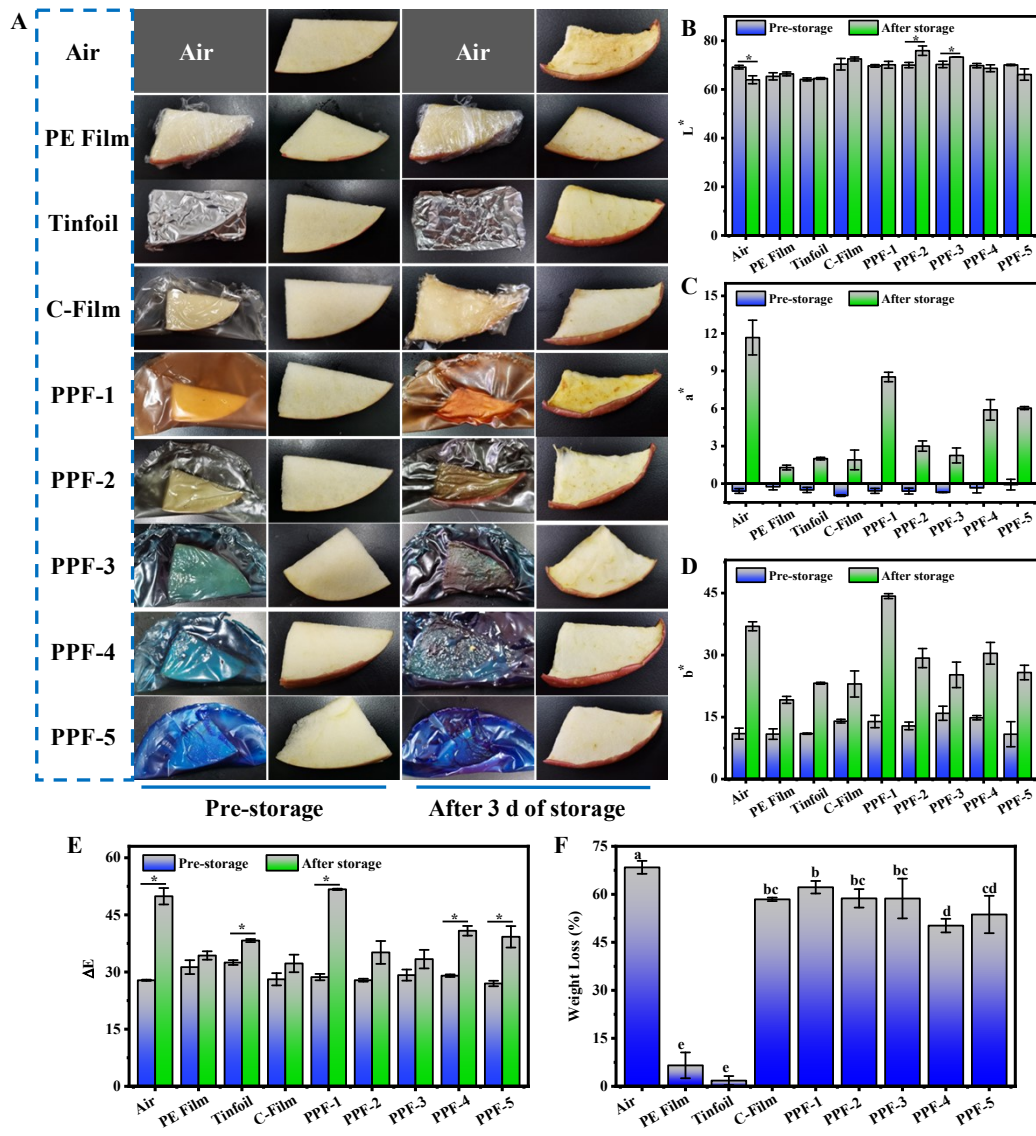

Fig. S5 (A) Appearance, color parameters included (B)  $L^*$ , (C)  $a^*$ , (D)  $b^*$  and (E)  $\Delta E$ , and (F) weight changes of apples packed with different packaging materials after 3 d of storage.
